# Supplementary material for: Counteracting learned non-use in chronic stroke patients with reinforcement-induced movement therapy
Source: PubMed Central journal article supplement (PMC4979116; doi:10.1186/s12984-016-0178-x), 2016-08-09

RESEARCH

# Supplementary Materials: Modeling and simulation of motor recovery in stroke patients

Belén Rubio Ballester<sup>1†</sup>, Martina Maier<sup>1†</sup>, Rosa María San Segundo Mozo<sup>2</sup>, Victoria Castañeda<sup>2</sup>, Armin Duff<sup>1</sup> and Paul F.M.J. Verschure<sup>1,3\*</sup>

\*Correspondence:

paul.verschure@upf.edu

<sup>1</sup>Laboratory of Synthetic, Perceptive, Emotive and Cognitive Systems, Universitat Pompeu Fabra, Roc Boronat 138, Barcelona, Spain

Full list of author information is available at the end of the article

<sup>†</sup>Equal contributor

This file includes:

- Supplementary Text
- Figures S1 to S4
- References

In the main text, we introduced a computational model of motor recovery after stroke that describes the close interaction between arm use and motor improvement. In the next sections we provide a detailed description of the implementation of this model and we present preliminary results from simulations.

## Computational Model description

In reaching movements, movement extent and direction have different sources of variable and systematic errors [1, 2], suggesting that hand paths are initially planned in vectorial coordinates without taking into account joint motions. Our model comprises a motor unit formed by two lateralized motor networks of direction-tuned cells, which generate vectorial planed movement trajectories, with specific extent and direction (Figure S1). The activity of each motor neuron is determined by the difference between the preferred direction of neuron  $i$   $\theta_p^i$  and the desired movement direction  $\theta_d$  [3, 4]:

$$y = [\cos(\theta_d - \theta_p^i) + N(0, \sigma_{SDN}^i)]^+ \quad (1)$$

$$where[x]^+ = \begin{cases} x, & if x > 0 \\ 0, & if x < 0 \end{cases}$$

The angle for the planed trajectory is the vector sum of the activity of each neuron  $i$ , and follows the same method as reported in [3]. In the network that codes movement extent, the length of the planed movement trajectory is determined by the weighted sum of activity of each neuron  $i$  in the network. Each weight  $w_i$  updates after execution as a function of error in extent given the activity of neuron  $i$ , rapidly adjusting to the optimal extent of an angle dependent trajectory:

$$\delta w_i = \eta(X_e - X_d)y_i(\theta_d, \theta_{p,i}). \quad (2)$$

where  $\eta$  is a learning rate,  $X_e$  is the executed movement extent, and  $X_d$  is the desired movement extent (i.e. the actual extent needed to reach the target position). Each of these networks contained 20 neurons, and the learning rate  $\eta$  was set at 0.5.

After execution, a combination of error-based and use-dependent learning mechanisms [3] updates the motor cortex contra-lateral to the selected limb, modulating the preferred angles of motor neurons to enhance performance accuracy in the future execution of similar movements. Each of this networks contained 500 neurons with uniformly distributed direction sensitivities (0-360 degrees). For the parameters in this network we used the same values reported in [3].

### *Estimation of Energies*

Planned trajectories in each hemisphere are transformed to intrinsic coordinates for estimating their biomechanical cost (i.e. energy). In the last decade, several authors referred to the general hypothesis that the nervous system optimizes performance as a function of energy expenditure [5, 6, 7]. Following this line, a previous study showed that humans prefer to select reaching movements which are biomechanically easier to perform [8]. This implies that the brain codes information about the future biomechanical costs of multiple movements, before deciding which one to execute. To account for this bias in action selection an independent unit in our model estimates the energies needed to achieve each planned joint angle. First, we add a unit in the motor cortex which performs the transformation of planned movements from vectorial coordinates to intrinsic coordinates. In order to compute the interaction torques produced at each joint by motions of upper arm and forearm segments we use the method described in [9] modified to account only for planar reaching movements with fixed shoulder positions (i.e. constrained trunk movements). Interaction torques for shoulder ( $T_s$ ) and elbow ( $T_e$ ) for each limb  $h$  (i.e. left or right) are given by:

$$T_{h,s} = \alpha \ddot{\theta}_s + \beta \ddot{\theta}_e + \gamma \dot{\theta}_e^2 - 2 * \gamma \dot{\theta}_s \dot{\theta}_s \quad (3)$$

$$T_{h,e} = \epsilon \ddot{\theta}_e + \beta \ddot{\theta}_s + \gamma \dot{\theta}_s^2$$

where

$$\alpha = m_s r_s^2 + I_s + m_e [l_s^2 + r_e^2 + 2l_s r_e \cos(\theta_e)] + I_e$$

$$\beta = m_e l_s r_e \cos(\theta_e) + m_e r_e^2 + I_e$$

$$\gamma = m_e l_e r_e \sin(\theta_e)$$

$$\epsilon = m_e r_e^2 + I_e$$

This transformation needs to take into account the anthropometric properties of the moving arm (mass of upper-arm  $m_s$ , mass of forearm  $m_e$ , center of mass of upper arm  $r_s$  and forearm  $r_e$ , length of upper arm  $l_s$  and forearm  $l_e$ , and moments of inertia at center of mass of the upper arm  $I_s$  and forearm  $I_e$ ). We used anthropometrical data from [10].

The expected energies for a specific action  $a$  are computed as the sum of the multiplication of angular velocity ( $\dot{\theta}$ ) and torques ( $T$ ) for shoulder and elbow at each time step  $t$  until the final time step  $n$ :

$$E_a = \sum_{t=0}^n T_s(t) \dot{\theta}_s(t) + T_e(t) \dot{\theta}_e(t) \quad (4)$$

### Action Selection

The action selection module is a variation of an interactive race model [11] divided in two competing units corresponding to two possible actions (i.e. reaching with the left limb or with the right limb). Each of them recursively accumulates action-specific activity  $A_h$  for each hand  $h$  given the expected reward of this action. In addition, it is recursively inhibited by the competing action network activity. As a result, targets appearing at left or right workspace will show higher probability of being reached by the ipsilateral hand. In addition, a noise term,  $N$ , is added to represent noise in input to account for exploration in action selection. Activity ( $A_{a,h}$ ) for action  $a$  (i.e. joint rotations for reaching towards an specific location) and limb  $h$  is given by:

$$A_{a,h}(t) = A_{a,h}(t-1) + s_r Q_{a,h} - s_e E_{a,h} - s_a A_{a,h-1}(t) + N(t) \quad (5)$$

where  $Q_{a,h}$  is the expected reward, and  $A_{a,h-1}$  is the accumulated activity for the competing action (i.e. selecting the other hand).  $s_r$ ,  $s_e$ , and  $s_a$  are scalars for the expected reward, expected energies and activity of the competing action respectively. This accumulation of activity in the action selection module simulates an increase in striatal dopamine, which outputs an action choice after reaching a threshold [12].

After action execution, the expected reward for the selected movement is updated in memory given the reward prediction error, that is, the difference between the actual reward  $R$  and the expected reward  $Q$  retrieved from memory [3]. These updates minimize the square of the reward prediction error. For the acquisition of expected rewards  $Q$  we used the same methods and parameters reported in [3]. Scalars used in the action selection rule were  $s_r = 0.4$ ,  $s_e = 100$ , and  $s_a = 0.7$ . Scalar values were found to provide greater influence for action selection to the expected reward, followed by expected energies and the activity of the competing action. Noise in the interactive race model is normally distributed, with zero mean and standard deviation 0.15, and threshold for action selection was set to 1.

## Results from the model

We implemented a computational model of hand selection to study the effect of different CIMT and RIMT therapy combinations on arm use and functional recovery.

First, we ran simulations of 2000 trials of training in order to obtain a model of a healthy subject. As in [3], we simulated a stroke by removing those direction-tuned cells in the motor unit that were sensitive to a specific set of angles (0-90 degrees) corresponding to the upper right workspace. Next, we provided 500 additional trials of training (Figure S4). We observed that immediately after neural removal, the accuracy of executed movements towards targets appearing at the upper-right workspace was affected, reaching a mean directional error of 30 degrees. At this stage, we simulated various combinations of two different treatments, CIMIT and RIMT. The first combination variable consisted of forcing the use of the paretic limb with a certain probability (from 0 to 0.9), and the second variable consisted of amplifying the visuomotor feedback with a certain factor (from -0.9 to 0.9). The negative or positive sign of this factor indicates a reduced or an increased directional error feedback respectively. In all simulations, the amplification factor  $G$  was fixed to 0.5 (see Equation 1), which reduced the extent of the movement (i.e. length of the movement trajectory) required to reach the target location to half. The model adjusted accordingly to simulate shorter trajectories, consequently reducing the associated expected energy.

We used this model of recovery to simulate the effects of 190 combinations of rehabilitation therapies (10 variations of CIMIT  $\times$  19 variations of RIMT) on hand selection patterns and performance in accuracy. Each therapy consisted of 3000 trials of training plus 2500 follow-up trials with no treatment. Results show that CIMIT alone (0.9 CIMIT and 0 RIMT) would promote paretic arm use (Figure S2). However, when both therapies are combined (0.3 CIMIT and 0.7 RIMT) equal results can be achieved. We observed very similar effects in the relearning of motor control (Figure S3), showing that those treatments that were most effective in promoting arm use did also induce the greater functional recovery. Contrarily, the amplification of error feedback discouraged the selection of the paretic limb and hampered recovery. In addition, preventing error-based learning by reducing error feedback in 90% impeded recovery.

We performed an analysis of arm use and motor function in a trial-by trial basis to further explore the model's dynamics under four representative conditions: no therapy, pure CIMIT, pure RIMT, and a combination of 30% CIMIT and 70% RIMT (CIMIT+RIMT). Results show that the averaged probability of choosing the paretic limb and mean directional errors across trials (within a 500 trial-window) Figure S3 increased in all treatment conditions. We identified a threshold of performance (15 degrees of directional error), that initiated a virtuous loop of recovery by promoting spontaneous use of the paretic limb. This bistable dynamics induced further performance improvement and restored typical hand selection patterns at follow-up. Contrarily, the no-therapy condition progressively discouraged the use of the affected limb and predicted further deterioration.

Finally, we used this modeling approach to explore the potential of these representative rehabilitation conditions for inducing cortical reorganization (Figure S4). Early simulated training trials mimicked a healthy subject with uniformly distributed direction-tuned cells. In the left cortex, these distribution showed a bias for recruiting more neurons sensitive to directions corresponding with the workspace ipsilateral to the contralateral limb (i.e. right limb). After inducing the stroke,

all treatment conditions induced positive cortical changes by redistributing intact neurons for covering those movement directions affected by the lesion. After the follow-up period, the distribution of direction-tuned cells across all possible input angles became more uniform, resembling a healthy subject. Notice however that the total number of cells was reduced. Contrarily, no treatment lead to an atypical distribution of neural resources.

#### Author details

<sup>1</sup>Laboratory of Synthetic, Perceptive, Emotive and Cognitive Systems, Universitat Pompeu Fabra, Roc Boronat 138, Barcelona, Spain. <sup>2</sup>Hospital Universitari Joan XXIII de Tarragona, c/ Dr. Mallafrè Guasch 4, Tarragona, Spain.

<sup>3</sup>Institució Catalana de Recerca i Estudis Avançats (ICREA), Barcelona, Spain.

#### References

1. Ghilardi, M.F., Gordon, J., Ghez, C.: Learning a visuomotor transformation in a local area of work space produces directional biases in other areas. *Journal of neurophysiology* **73**(6), 2535–2539 (1995)
2. Vindras, P., Desmurget, M., Prablanc, C., Viviani, P.: Pointing errors reflect biases in the perception of the initial hand position. *Journal of neurophysiology* **79**(6), 3290–4 (1998)
3. Han, C.E., Arbib, M.A., Schweighofer, N.: Stroke rehabilitation reaches a threshold. *PLoS computational biology* **4**(8), 1000133 (2008). doi:10.1371/journal.pcbi.1000133
4. Todorov, E.: Cosine tuning minimizes motor errors. *Neural computation* **14**(6), 1233–1260 (2002). doi:10.1162/089976602753712918
5. Todorov, E.: Optimality principles in sensorimotor control. *Nature Neuroscience* **7**(9), 907–915 (2004). doi:10.1038/nn1309
6. Körding, K.P., Ko, K.P., Wolpert, D.M.: Bayesian decision theory in sensorimotor control. *Trends in cognitive sciences* **10**(7), 319–26 (2006). doi:10.1016/j.tics.2006.05.003
7. Cisek, P.: Making decisions through a distributed consensus. *Current Opinion in Neurobiology* **22**(6), 927–936 (2012). doi:10.1016/j.conb.2012.05.007
8. Cos, I., Bélanger, N., Cisek, P.: The influence of predicted arm biomechanics on decision making. *Journal of neurophysiology* **105**(March 2011), 3022–3033 (2011). doi:10.1152/jn.00975.2010
9. Bagesteiro, L.B., Sainburg, R.L.: Handedness : Dominant Arm Advantages in Control of Limb Dynamics. *Journal of neurophysiology* **88**(5), 2408–2421 (2009). doi:10.1152/jn.00901.2001
10. Tee, K.P., Burdet, E., Chew, C.M., Milner, T.E.: A model of force and impedance in human arm movements. *Biological Cybernetics* **90**(5), 368–375 (2004). doi:10.1007/s00422-004-0484-4
11. Wong, K.-F.: A Recurrent Network Mechanism of Time Integration in Perceptual Decisions. *Journal of Neuroscience* **26**(4), 1314–1328 (2006). doi:10.1523/JNEUROSCI.3733-05.2006
12. Wang, X.-J.: Decision Making in Recurrent Neuronal Circuits. *Neuron* **60**(2), 215–234 (2008). doi:10.1016/j.neuron.2008.09.034. NIHMS150003

#### Figures

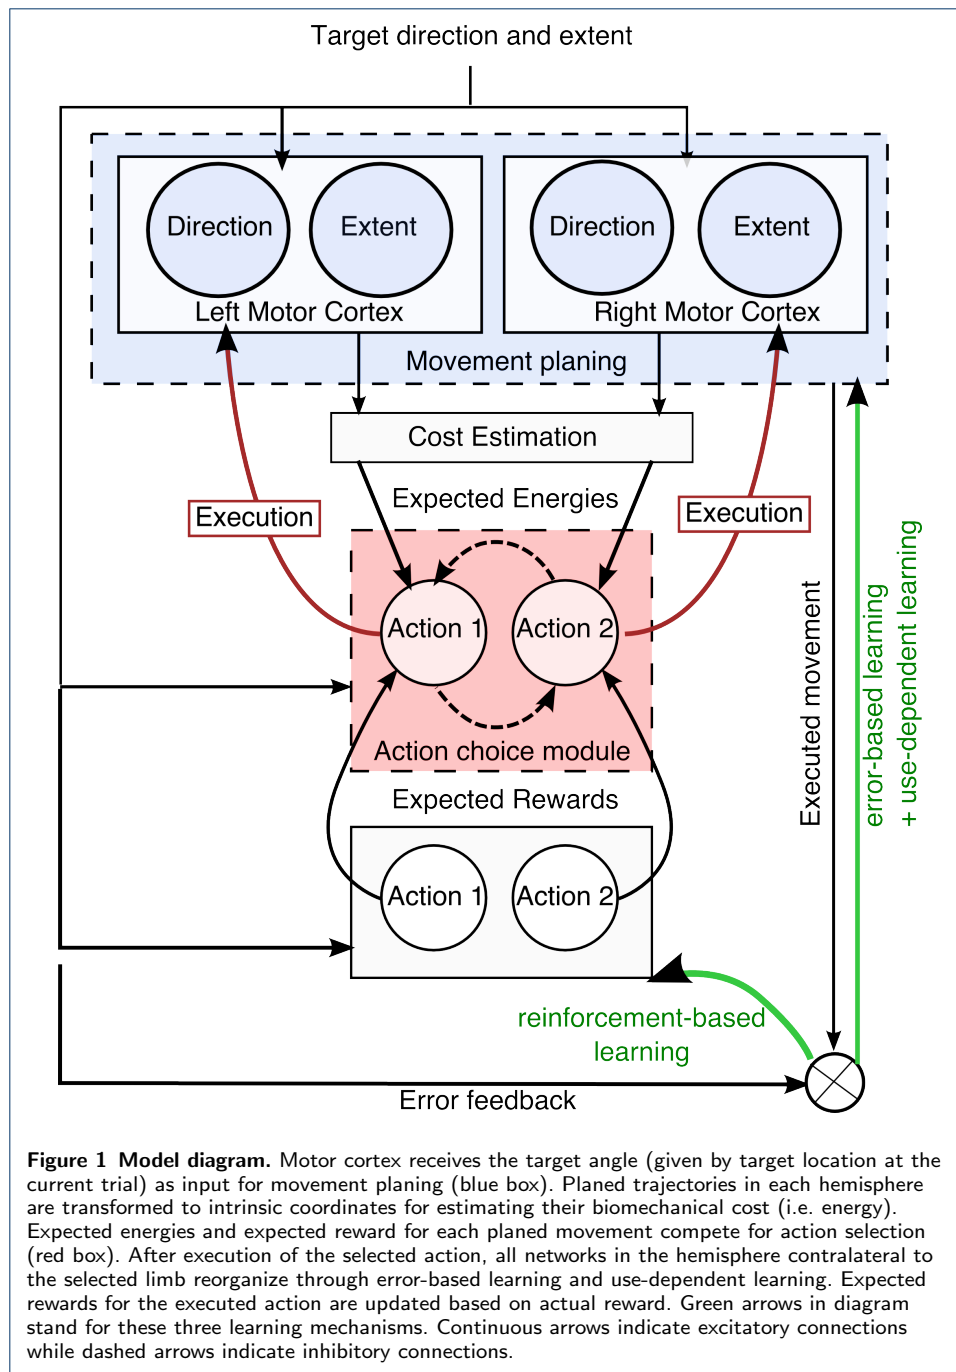

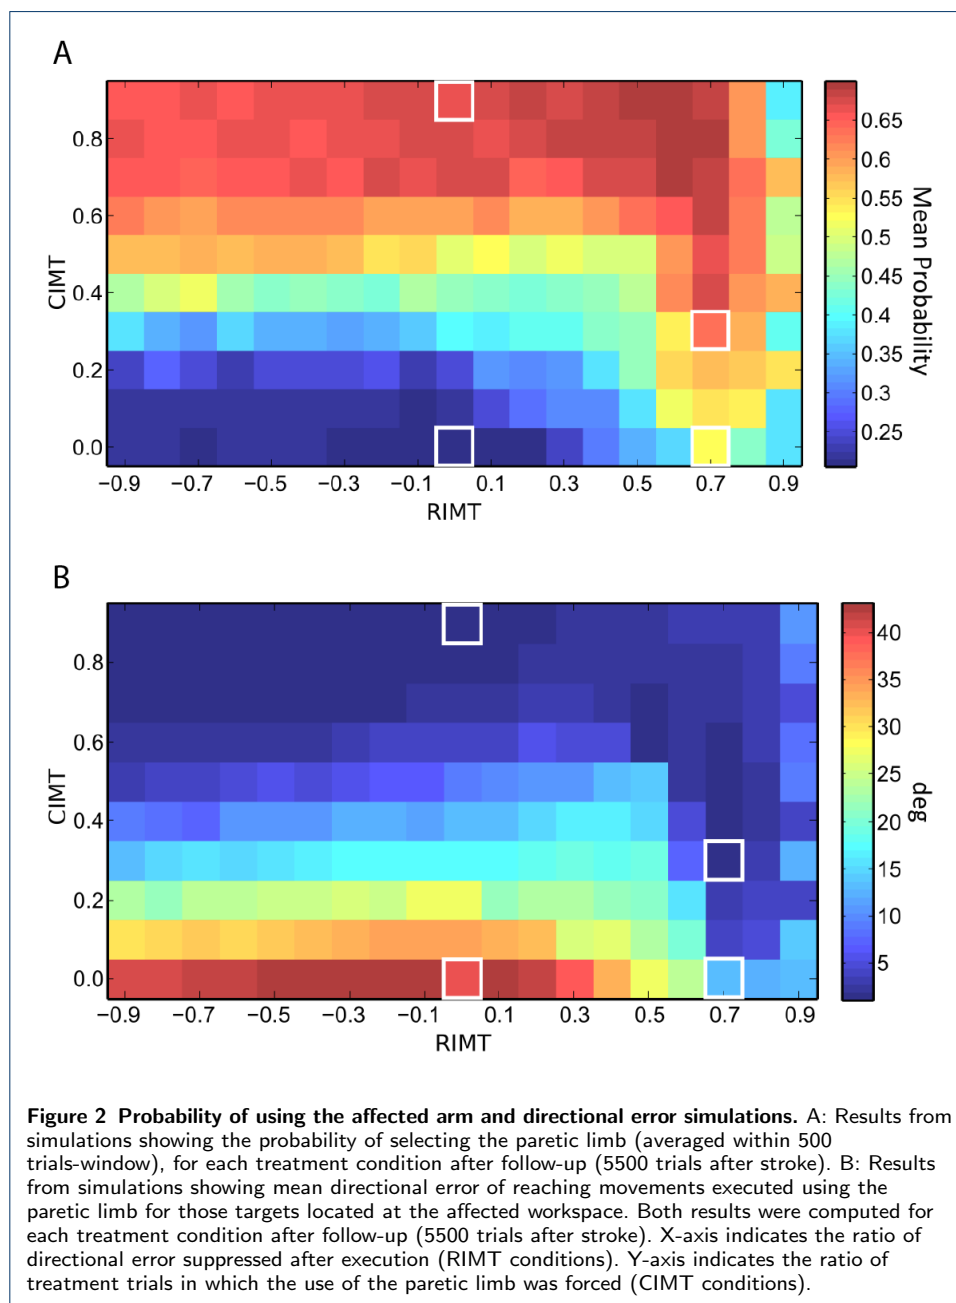

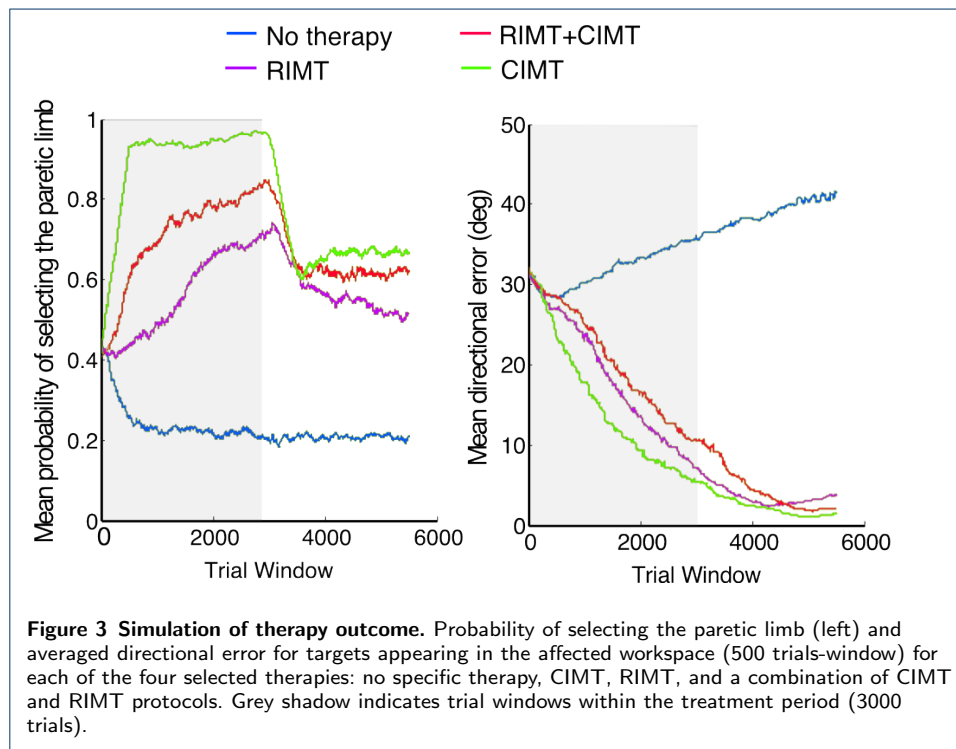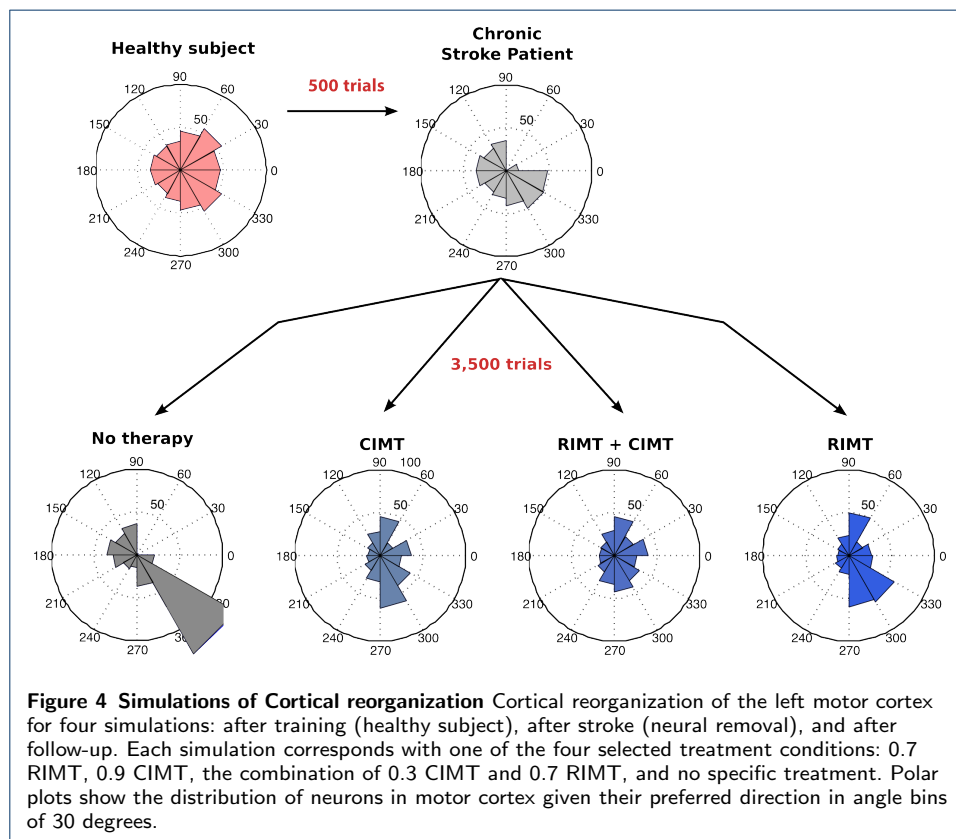

Supplement: 12984_2016_178_MOESM1_ESM.pdf [file 12984_2016_178_MOESM1_ESM.pdf]
