# Supplementary material for: Counteracting learned non-use in chronic stroke patients with reinforcement-induced movement therapy
Source: PubMed Central journal article supplement (PMC4979116; doi:10.1186/s12984-016-0178-x), 2016-08-09

## CONSORT 2010 Flow Diagram

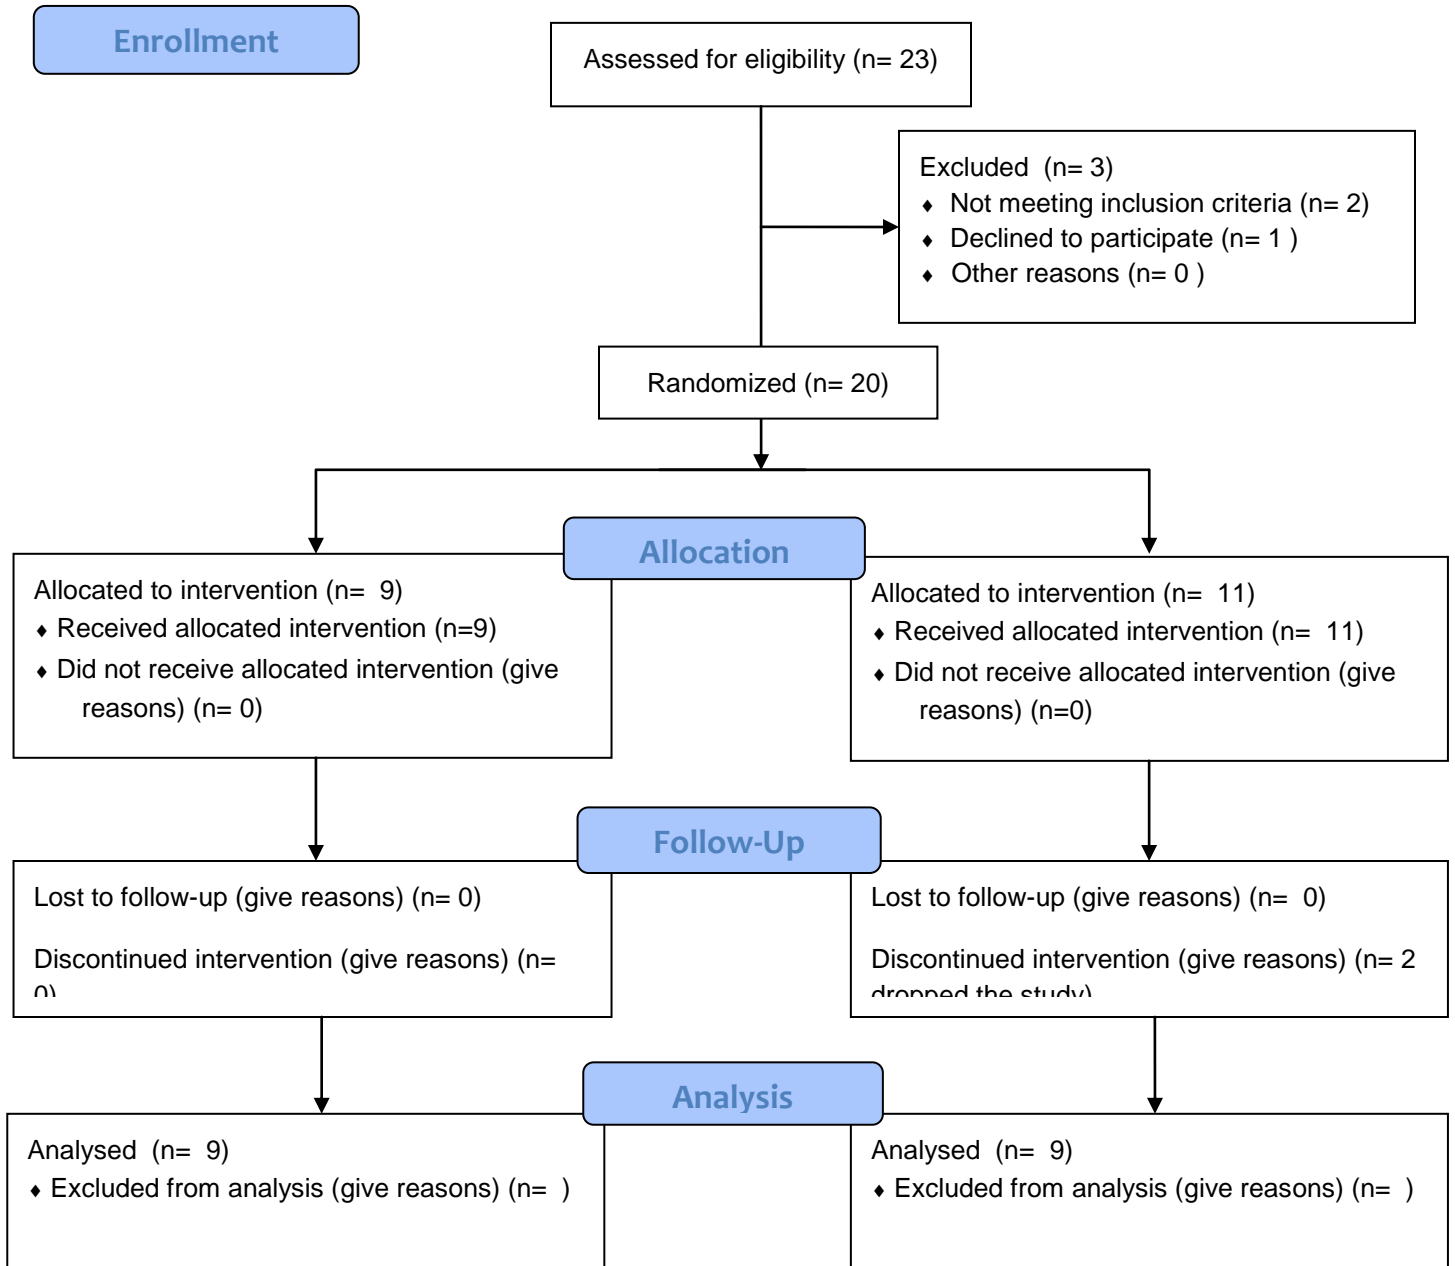

Supplement: 12984_2016_178_MOESM2_ESM.pdf [file 12984_2016_178_MOESM2_ESM.pdf]
